# Supplementary material for: Subcutaneous Leydig Stem Cell Autograft: A Promising Strategy to Increase Serum Testosterone
Source: PubMed Central journal article supplement — Stem Cells Transl Med. 2018 Oct 2;8(1):58–65. doi: 10.1002/sctm.18-0069 (PMC6312442; doi:10.1002/sctm.18-0069), 2018-10-02
Supplement: SCT3-8-58-s001.pdf [file SCT3-8-58-s001.pdf]

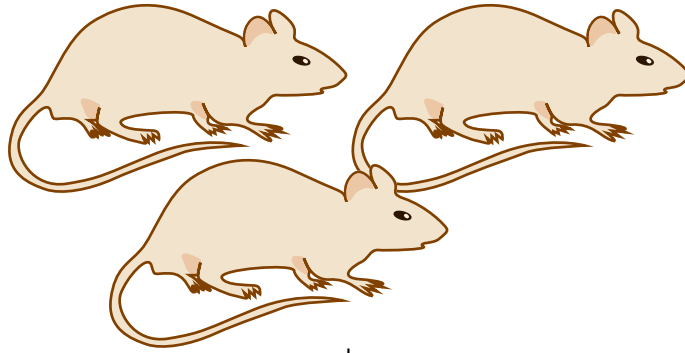

**Orchiectomy**

**LSCs isolated and cultured for 7 days**

**Cells autografted subcutaneously for 15days/30days**

**Animals survived for 4 weeks before sacrificing them and isolating blood and autograft for further analysis**
